# Supplementary material for: Inverse Correlation Between Grip Strength and Serum Phosphorus: A Retrospective Observational Study in Japanese Elderly with Poorly Controlled Type 2 Diabetes
Source: MDPI journal article supplement (doi:10.3390/geriatrics5020033), 2020-05-19
Supplement: s1 [file s1]

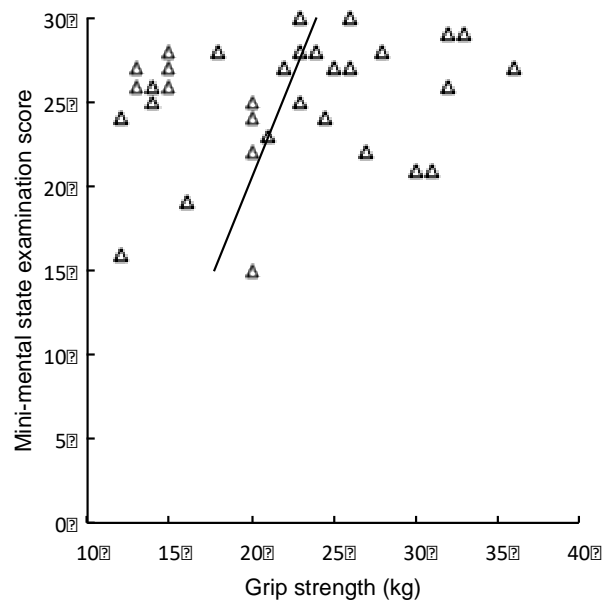

**Figure S1.** Correlation analysis between mini-mental examination score and hand grip strength. The vertical axis indicates the mini-mental examination score. The horizontal axis indicates grip strength (kg). Pearson's correlation coefficient of  $r = -0.226$  ( $p = 0.21$ ).
